# Supplementary material
Source: HighWire-hosted journal article supplement (https://innovations.bmj.com/highwire/filestream/139257/field_highwire_adjunct_files/1/bmjinnov-2022-000968supp002_data_supplement.pdf)

### The ParaNASPP-application

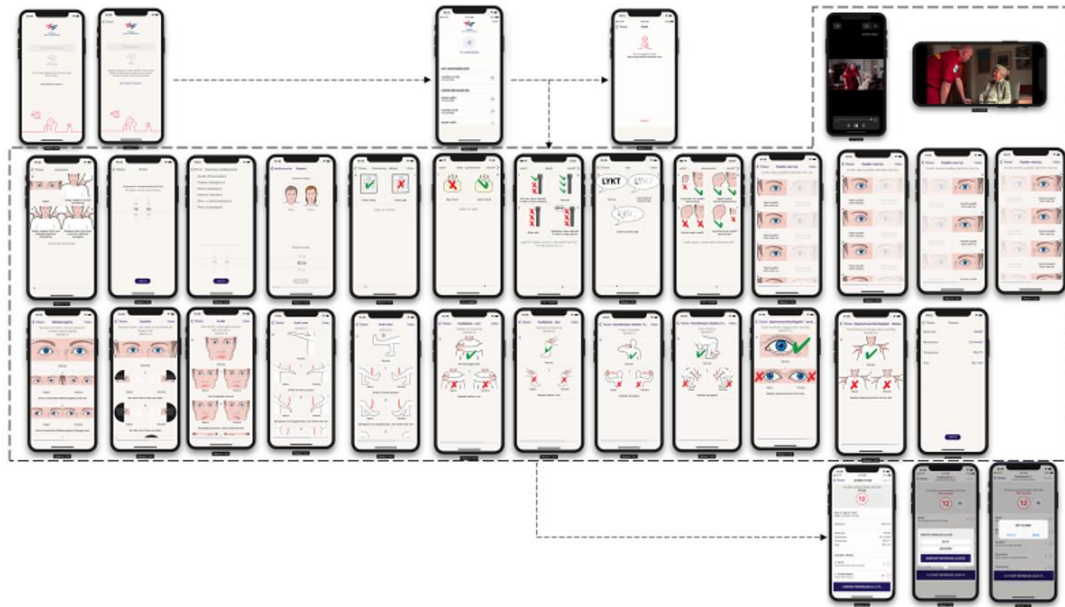

Supplement: bmjinnov-2022-000968supp002_data_supplement.pdf [file bmjinnov-2022-000968supp002_data_supplement.pdf]
